# Supplementary material
Source: PubMed Central journal article supplement (PMC5529176)
Supplement: mmc1.pdf [file mmc1.pdf]

**Biophysical Journal, Volume 113**

**Supplemental Information**

**Martini Coarse-Grained Force Field:**

**Extension to RNA**

**Jaakko J. Uusitalo, Helgi I. Ingólfsson, Siewert J. Marrink, and Ignacio Faustino**

Supporting Information for:

## Martini Coarse-Grained Force Field: Extension to RNA

*J.J. Uusitalo<sup>1</sup>, H.I. Ingólfsson<sup>1, †</sup>, S.J. Marrink<sup>1,\*</sup>, I. Faustino<sup>1</sup>.*

*<sup>1</sup>Groningen Biomolecular Sciences and Biotechnology Institute and Zernike Institute for Advanced Materials, University of Groningen, Nijenborgh 7, 9747 AG Groningen, The Netherlands.*

*<sup>†</sup>Current address: Lawrence Livermore National Laboratory, 7000 East Avenue, L-367, Livermore, CA 94550*

*\*Correspondence: [s.j.marrink@rug.nl](mailto:s.j.marrink@rug.nl)*

**Table S1.** Sequences of the short ssRNAs used to parameterize the bonded interactions.

| Sequence |
|----------|
| AAAA     |
| ACAC     |
| AGAG     |
| AUAU     |
| CCCC     |
| CUUG     |
| GAAA     |
| GAGA     |
| GCAA     |
| GCGA     |
| GCGC     |
| GGAA     |
| GGGA     |
| GGGG     |
| GUAA     |
| GUGA     |
| GUUG     |
| UACG     |
| UCCG     |
| UGCG     |
| UGGU     |
| UUCG     |
| UUUU     |

**Table S2.** The Martini RNA bead mapping.

| Bead name         | Bead type | Mapped atoms                  |
|-------------------|-----------|-------------------------------|
| BB1               | Q0        | P, OP1/O1P, OP2/O2P, O5', O3' |
| BB2               | SN0       | C5', O4', C4                  |
| BB3               | SNda      | C3', C2', C1'                 |
| SC1<br>(adenine)  | TN0       | N9, C4                        |
| SC2<br>(adenine)  | TA2       | C2, N3                        |
| SC3<br>(adenine)  | TA3       | C6, N6, N1                    |
| SC4<br>(adenine)  | TNa       | C8, N7, C5                    |
| SC1<br>(cytosine) | TN0       | N1, C6                        |
| SC2<br>(cytosine) | TY2       | N3, C2, O2                    |
| SC3<br>(cytosine) | TY3       | C5, C4, N4                    |
| SC1<br>(guanine)  | TN0       | N9, C4                        |
| SC2<br>(guanine)  | TG2       | C2, N2, N3                    |
| SC3<br>(guanine)  | TG3       | C6, O6, N1                    |
| SC4<br>(guanine)  | TNa       | C8, N7, C5                    |
| SC1<br>(uracil)   | TN0       | N1, C6                        |
| SC2<br>(uracil)   | TT2       | N3, C2, O2                    |
| SC3<br>(uracil)   | TT3       | C5, C4, O4                    |

**Table S3.** The Martini RNA bonded parameters.

| Beads               | Type | Position of minimum <sup>1</sup> | Force constant <sup>1</sup> |
|---------------------|------|----------------------------------|-----------------------------|
| BB1-BB2             | 1    | 0.363                            | 20 000                      |
| BB2-BB3             | 1    | 0.202                            | 40 000                      |
| BB3-BB1             | 1    | 0.354                            | 10 000                      |
| BB1-BB2-BB3         | 2    | 117.0                            | 175                         |
| BB2-BB3-BB1         | 2    | 95.0                             | 105                         |
| BB3-BB1-BB2         | 2    | 93.0                             | 75                          |
| BB1-BB2-BB3-BB1     | 2    | 0.0                              | 3.5                         |
| BB2-BB3-BB1-BB2     | 1    | 0.0 <sup>4</sup>                 | 1                           |
| BB3-BB1-BB2-BB3     | 9    | -10.0 <sup>2</sup>               | 1.5                         |
| BB3-BB1-BB2-BB3     | 9    | 10.0 <sup>2</sup>                | 1.5                         |
| BB3-ASC1            | 1    | 0.293                            | 28 000                      |
| ASC1-ASC2           | 1    | 0.234                            | constraint                  |
| ASC2-ASC3           | 1    | 0.263                            | constraint                  |
| ASC2-ASC4           | 1    | 0.335                            | 40 000                      |
| ASC3-ASC4           | 1    | 0.299                            | constraint                  |
| ASC4-ASC1           | 1    | 0.162                            | constraint                  |
| BB2-BB3-ASC1        | 2    | 101.0                            | 260                         |
| BB3-ASC1-ASC2       | 2    | 153.0                            | 90                          |
| BB3-ASC1-ASC4       | 2    | 135.0                            | 185                         |
| ASC1-ASC2-ASC3      | 1    | 87.0                             | 200                         |
| ASC1-BB3-BB1        | 2    | 160.0                            | 15                          |
| ASC2-ASC1-ASC4      | 1    | 115.0                            | 200                         |
| ASC2-ASC3-ASC4      | 1    | 74.0                             | 200                         |
| ASC3-ASC4-ASC1      | 1    | 92.0                             | 200                         |
| BB1-BB2-BB3-ASC1    | 2    | 180.0                            | 1.5                         |
| BB2-BB3-ASC1-ASC2   | 1    | -40.0 <sup>2</sup>               | 4                           |
| BB2-BB3-ASC1-ASC2   | 2    | 180.0                            | 2                           |
| BB2-BB3-ASC1-ASC4   | 1    | -10.0 <sup>2</sup>               | 5                           |
| BB2-BB3-ASC1-ASC4   | 2    | 80.0                             | 0.5                         |
| ASC1-ASC2-ASC3-ASC4 | 2    | 0.0                              | 10                          |
| BB3-CSC1            | 1    | 0.280                            | 11 000                      |
| CSC1-CSC2           | 1    | 0.224                            | constraint                  |
| CSC2-CSC3           | 1    | 0.281                            | constraint                  |
| CSC3-CSC1           | 1    | 0.267                            | constraint                  |

|                     |   |                    |            |
|---------------------|---|--------------------|------------|
| BB2-BB3-CSC1        | 2 | 94.0               | 230        |
| BB3-CSC1-CSC2       | 2 | 103.0              | 170        |
| BB2-CSC1-CSC3       | 1 | 155.0              | 100        |
| CSC1-BB3-BB1        | 1 | 130.0              | 0.5        |
| CSC1-CSC2-CSC3      | 1 | 61.0               | 200        |
| CSC2-CSC1-CSC3      | 1 | 71.0               | 200        |
| CSC2-CSC3-CSC1      | 1 | 47.0               | 200        |
| BB1-BB2-BB3-CSC1    | 1 | 55.0 <sup>2</sup>  | 3          |
| BB1-BB2-BB3-CSC1    | 2 | -130.0             | 1          |
| BB2-BB3-CSC1-CSC2   | 2 | 180.0              | 3          |
| BB2-BB3-CSC1-CSC2   | 1 | 0.0 <sup>6</sup>   | 2          |
| BB3-GSC1            | 1 | 0.292              | 20 000     |
| GSC1-GSC2           | 1 | 0.296              | constraint |
| GSC2-GSC3           | 1 | 0.291              | constraint |
| GSC2-GSC4           | 1 | 0.385              | 40 000     |
| GSC3-GSC4           | 1 | 0.296              | constraint |
| GSC4-GSC1           | 1 | 0.162              | constraint |
| BB2-BB3-GSC1        | 2 | 103.0              | 260        |
| BB3-GSC1-GSC2       | 2 | 129.0              | 80         |
| BB3-GSC1-GSC4       | 2 | 137.0              | 120        |
| GSC1-GSC2-GSC3      | 1 | 72.0               | 200        |
| GSC1-BB3-BB1        | 2 | 170.0              | 20         |
| GSC2-GSC1-GSC4      | 1 | 117.0              | 200        |
| GSC2-GSC3-GSC4      | 1 | 84.0               | 200        |
| GSC3-GSC4-GSC1      | 1 | 96.5               | 200        |
| BB1-BB2-BB3-GSC1    | 1 | -20.0 <sup>2</sup> | 1          |
| BB2-BB3-GSC1-GSC2   | 2 | 180.0              | 3.5        |
| BB2-BB3-GSC1-GSC4   | 1 | 0.0 <sup>2</sup>   | 5          |
| GSC1-GSC2-GSC3-GSC4 | 2 | 0.0                | 10         |
| BB3-USC1            | 1 | 0.286              | 18 000     |
| USC1-USC2           | 1 | 0.224              | constraint |
| USC2-USC3           | 1 | 0.289              | constraint |
| USC3-USC1           | 1 | 0.276              | constraint |
| BB2-BB3-USC1        | 2 | 95.0               | 225        |
| BB3-USC1-USC2       | 2 | 99.0               | 200        |
| BB2-USC1-USC3       | 1 | 155.0              | 100        |
| USC1-BB3-BB1        | 1 | 180.0              | 5          |

|                   |   |                  |     |
|-------------------|---|------------------|-----|
| USC1-USC2-USC3    | 1 | 55.0             | 100 |
| USC2-USC1-USC3    | 1 | 83.0             | 100 |
| USC2-USC3-USC1    | 1 | 42.0             | 100 |
| BB1-BB2-BB3-USC1  | 1 | 0.0 <sup>2</sup> | 2   |
| BB2-BB3-USC1-USC2 | 2 | 180.0            | 4   |
| BB2-BB3-USC1-USC3 | 1 | 0.0 <sup>6</sup> | 2   |

<sup>1</sup>Units for the position of the minimum are nm (bonds) or degrees (angles), units for the force constants are  $\text{kJ mol}^{-1} \text{nm}^{-2}$  (bonds),  $\text{kJ mol}^{-1}$  (angles), or  $\text{kJ mol}^{-1} \text{rad}^{-2}$  (dihedrals). In addition to the standard exclusions of bonded neighbors, the second neighbors are also excluded in the backbone and the base beads are excluded from the backbone beads of the same residue.

<sup>2</sup>Multiplicity of the dihedral is 2. <sup>3</sup>Multiplicity of the dihedral is 3. <sup>4</sup>Multiplicity of the dihedral is 4. <sup>6</sup>Multiplicity of the dihedral is 6.

**Table S4.** Sequence of the 100 base pair random dsRNA used for persistence length calculation. For comparison, the same sequence was used for the dsDNA molecule by changing the uracils by thymines.

| Sequence                                                                                                                                                                                                             |
|----------------------------------------------------------------------------------------------------------------------------------------------------------------------------------------------------------------------|
| GGGUAUUCAGCCGUCUCCACCAACACAACGCUAUCGGGUCAUAUUUAUAAGAUUCCGCAAUGGG<br>ACUACUUUAUAGGUUGCCUUAACGAUAUCCGCAACUUAAGUUGCGGAUAUCGUUAAGGCAACCU<br>AUAAGUAGUCCCAUUGCGGAAUCUUAUAUAUGACCCGAUAGCGUUGUGUUGGUGGAGACGGC<br>UGAUUACCCU |



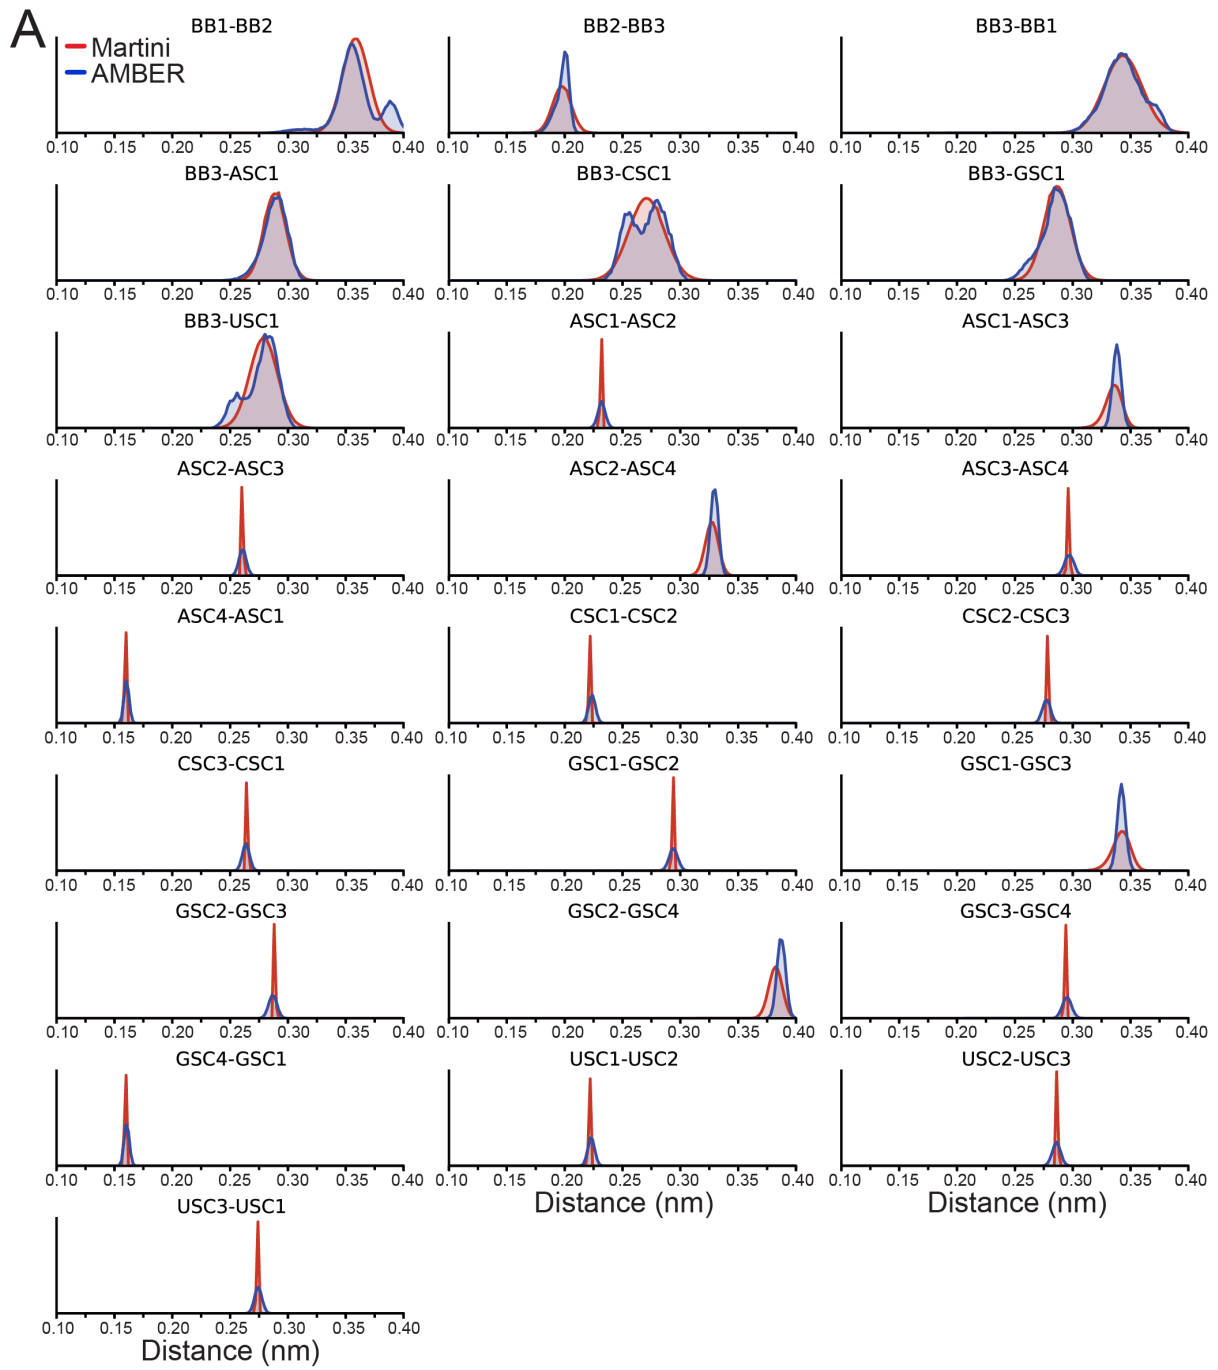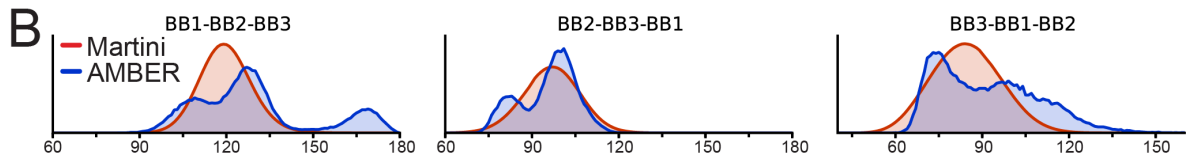

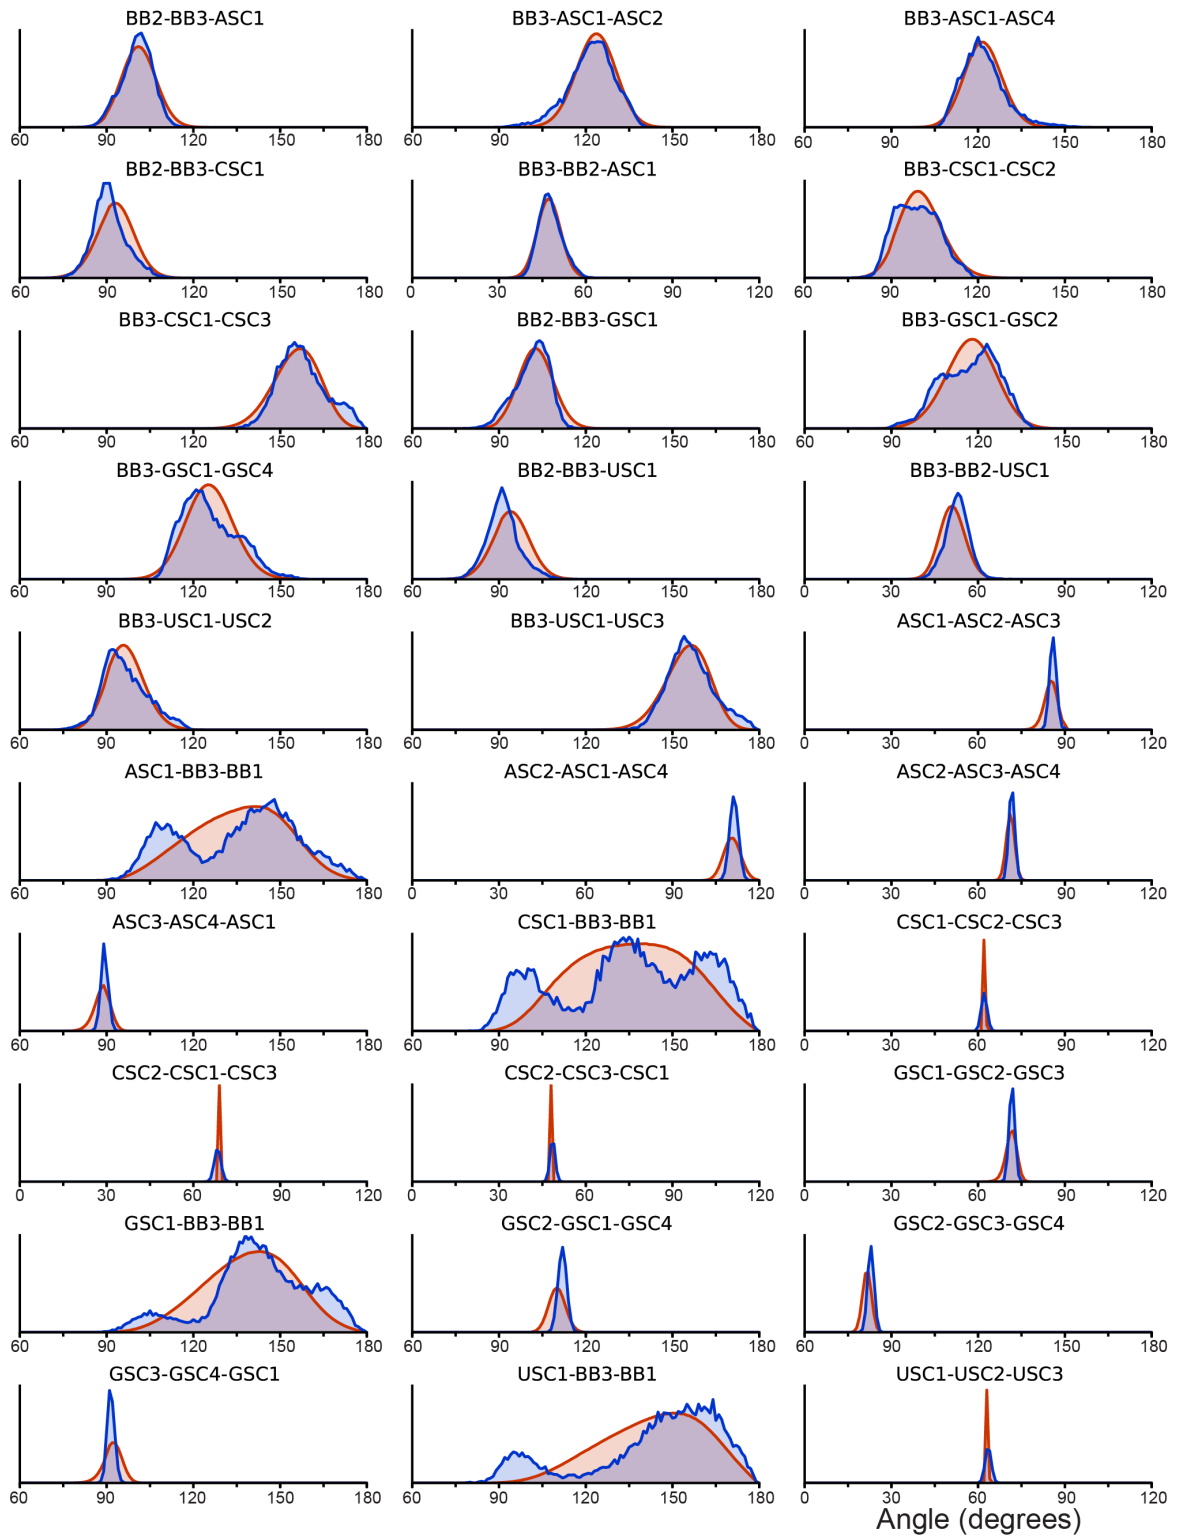

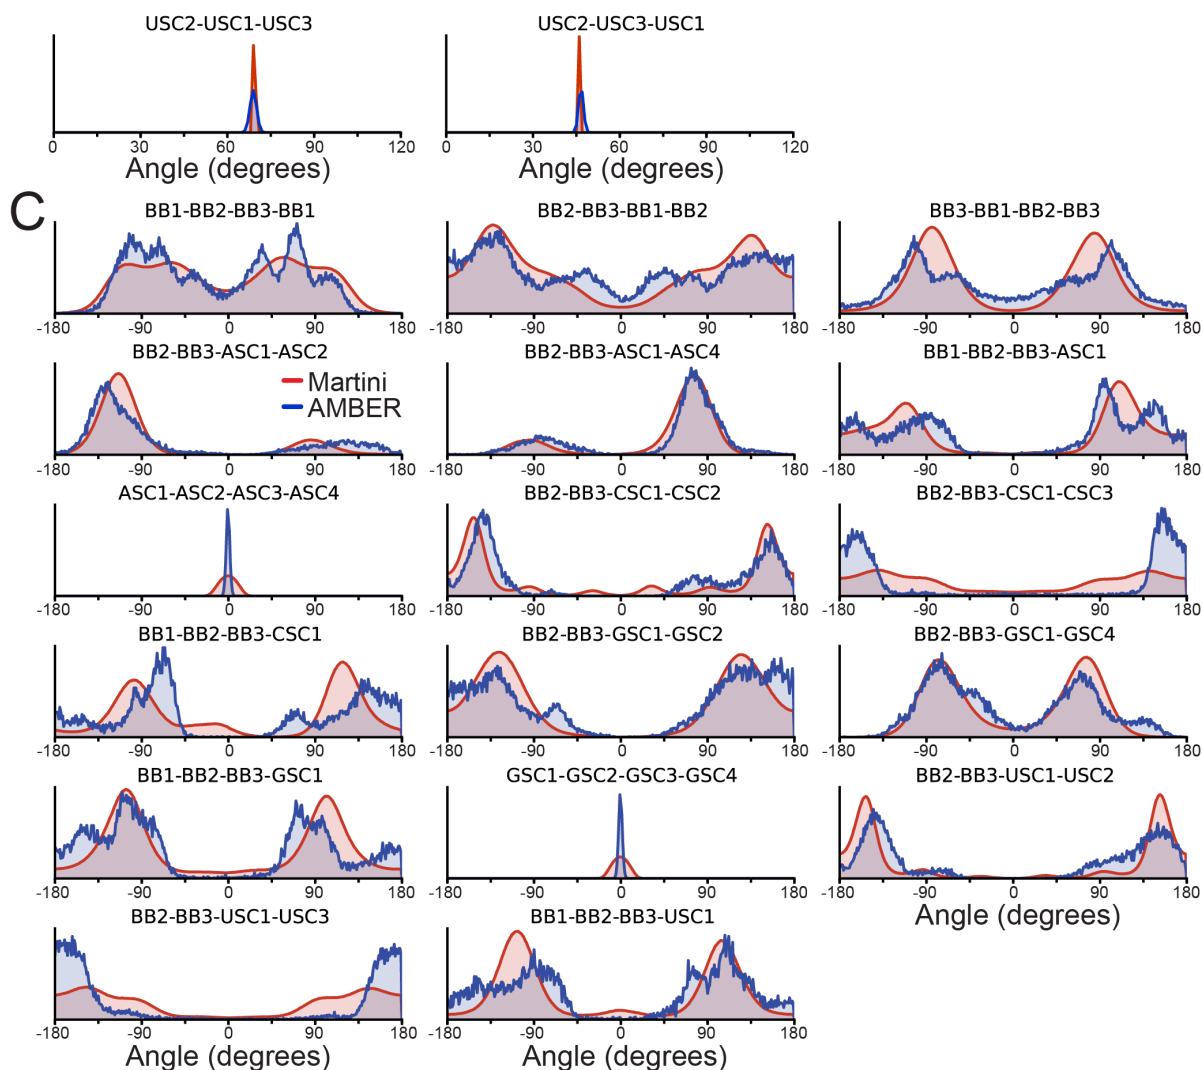

**Figure S1.** CG and AA distributions of bonded terms. The average distribution from Martini CG simulations is shown in red whereas the average AMBER AA distribution is in blue. The title of each subplot lists the beads that participate in the (A) bond, (B) angle or (C) dihedral distribution and the letter in the beginning of side chain beads denotes to which nucleobase the bead belongs to. Beads are named according to the naming scheme of Table S2.

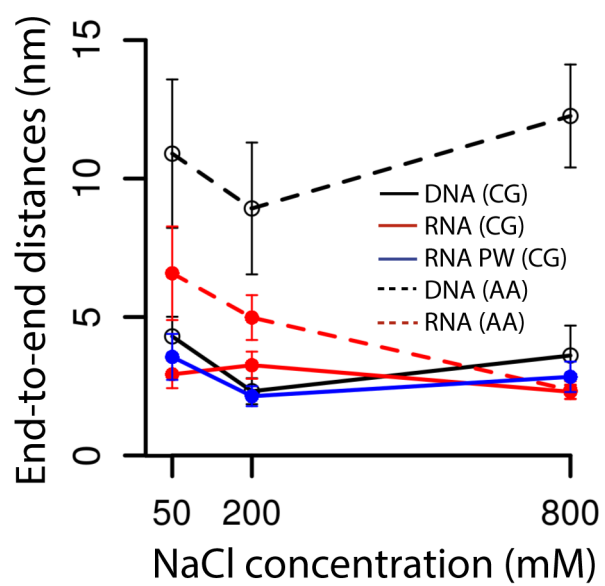

**Figure S2.** Comparison of end-to-end distances of single strand 40-mer polyT and polyU molecules. Values from CG simulations are shown as solid lines and from atomistic simulations as dashed lines.

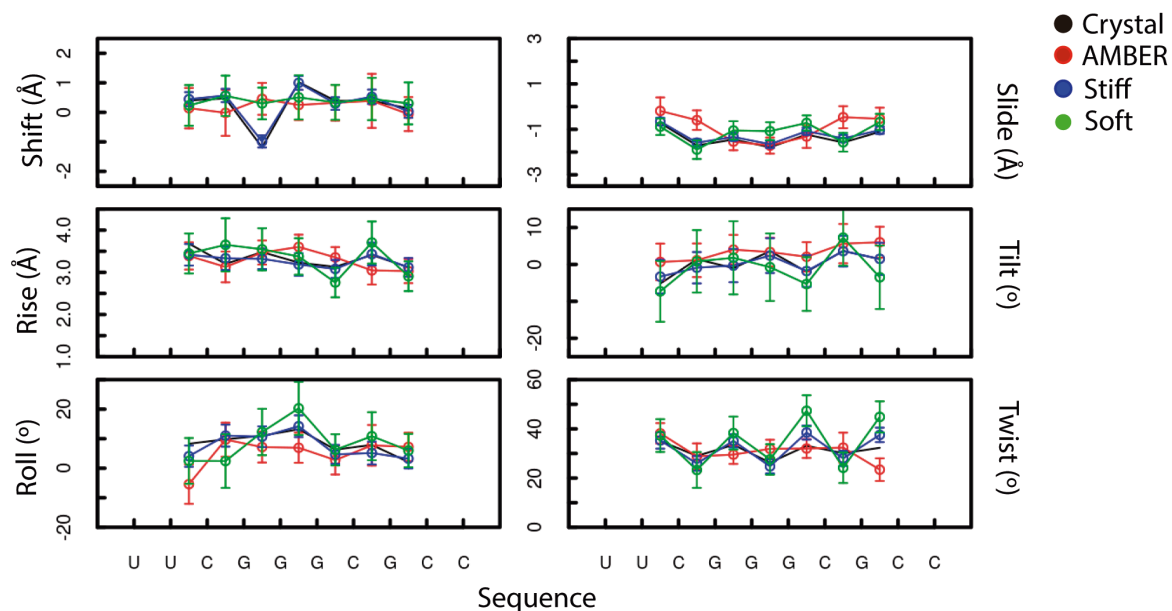

**Figure S3.** Base pair step helical parameters. Values obtained from 100 ns simulation of a 1FIX DNA:RNA hybrid molecule in 150 mM NaCl. The values from the crystal structure are in black, atomistic AMBER simulations in red, stiff RNA Martini model in blue and soft RNA Martini model in green.

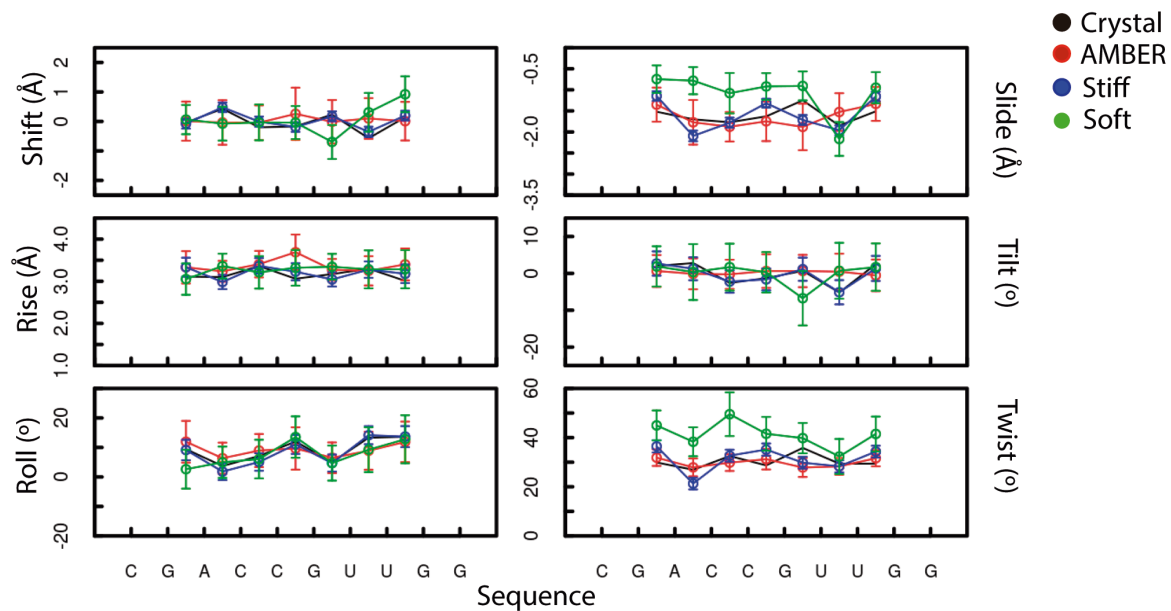

**Figure S4.** Base pair step helical parameters. Values obtained from 100 ns simulation of a 1QC0 dsRNA molecule in 150 mM NaCl. The values from the crystal structure are in black, atomistic AMBER simulations in red, stiff RNA Martini model in blue and soft RNA Martini model in green.

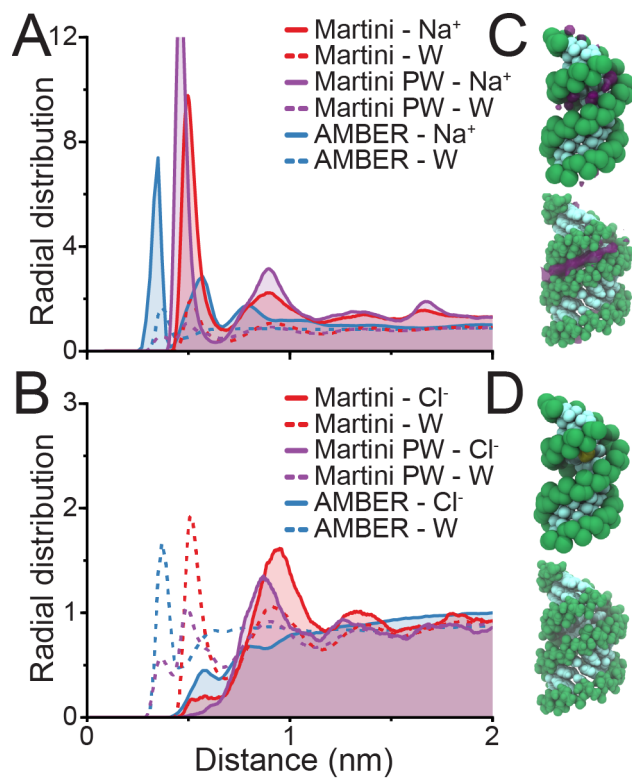

**Figure S5.** Ion distribution around dsRNA. The ion distribution around the phosphate beads of RNA for (A) sodium and (B) chloride from simulations in 1000 mM NaCl solution. Volume maps of locations most commonly occupied by sodium (C) and chloride (D) are shown for Martini (top) and AMBER (bottom) simulations.

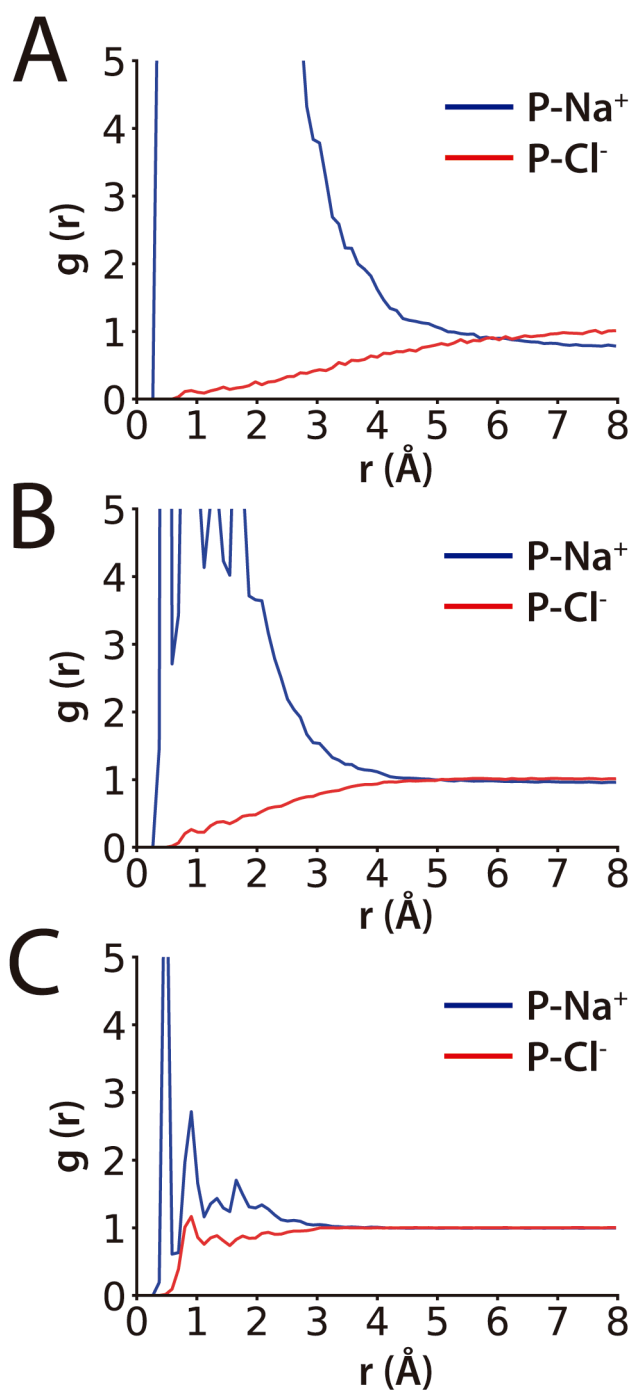

**Figure S6.** RNA phosphate-ions radial distribution functions for the 1RNA dsRNA molecule in a 190 Å box of 10 (A), 100 (B) and 1000 (C) mM NaCl. Simulations were run with the polarizable water model.



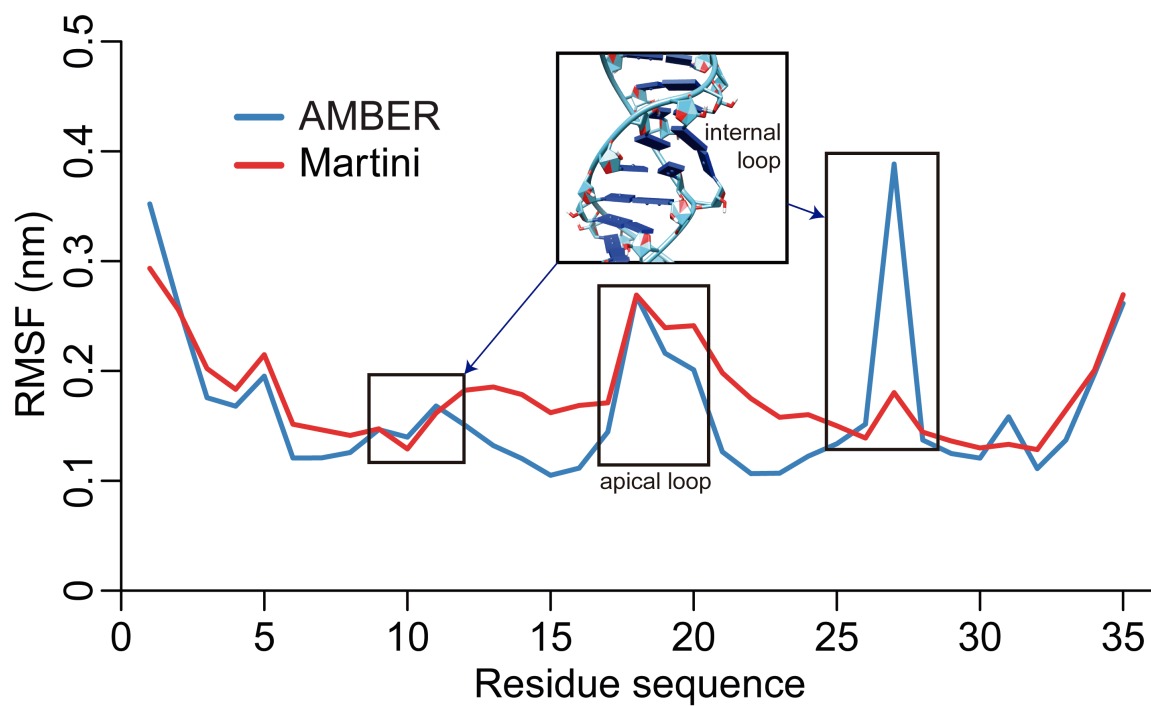

**Figure S7. Local flexibility of the RNA containing a long internal and an apical loops (PDB-ID 4FNJ).** The root-mean-square fluctuations (RMSF) are visibly increased in the apical loop (residues 17-21) and in one of the long internal strands (9-12 and 26-28).

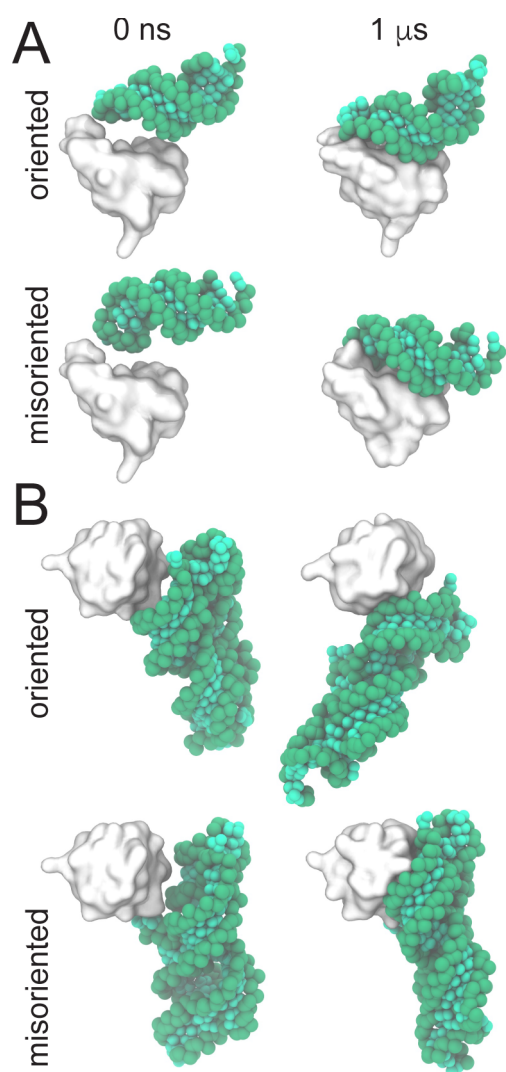

**Figure S8. Spontaneous binding of RNA and protein with CG simulations.** Initial and final snapshots after 1  $\mu$ s simulation time of the protein 19 of the human signal recognition particle (SRP19) in a complex with helix 6 of the Human SRP RNA (PDB-ID: 1JID) (A) and the SRP19 protein with the 7S.S RNA from the thermophilic methanogenic archaea (*M. jannaschii*) (PDB-ID: 1LNG) (B). Two relative orientations were used to simulate spontaneous binding: a 1 nm distant initial configuration between RNA and protein molecules ('oriented') and another with an additional 90° rotation ('misoriented'). A small fraction of the native contacts was recovered.
